# Supplementary material for: Acute social and physical stress interact to influence social behavior: The role of social anxiety
Source: PubMed Central journal article supplement (PMC6201881; doi:10.1371/journal.pone.0204665), 2018-10-25

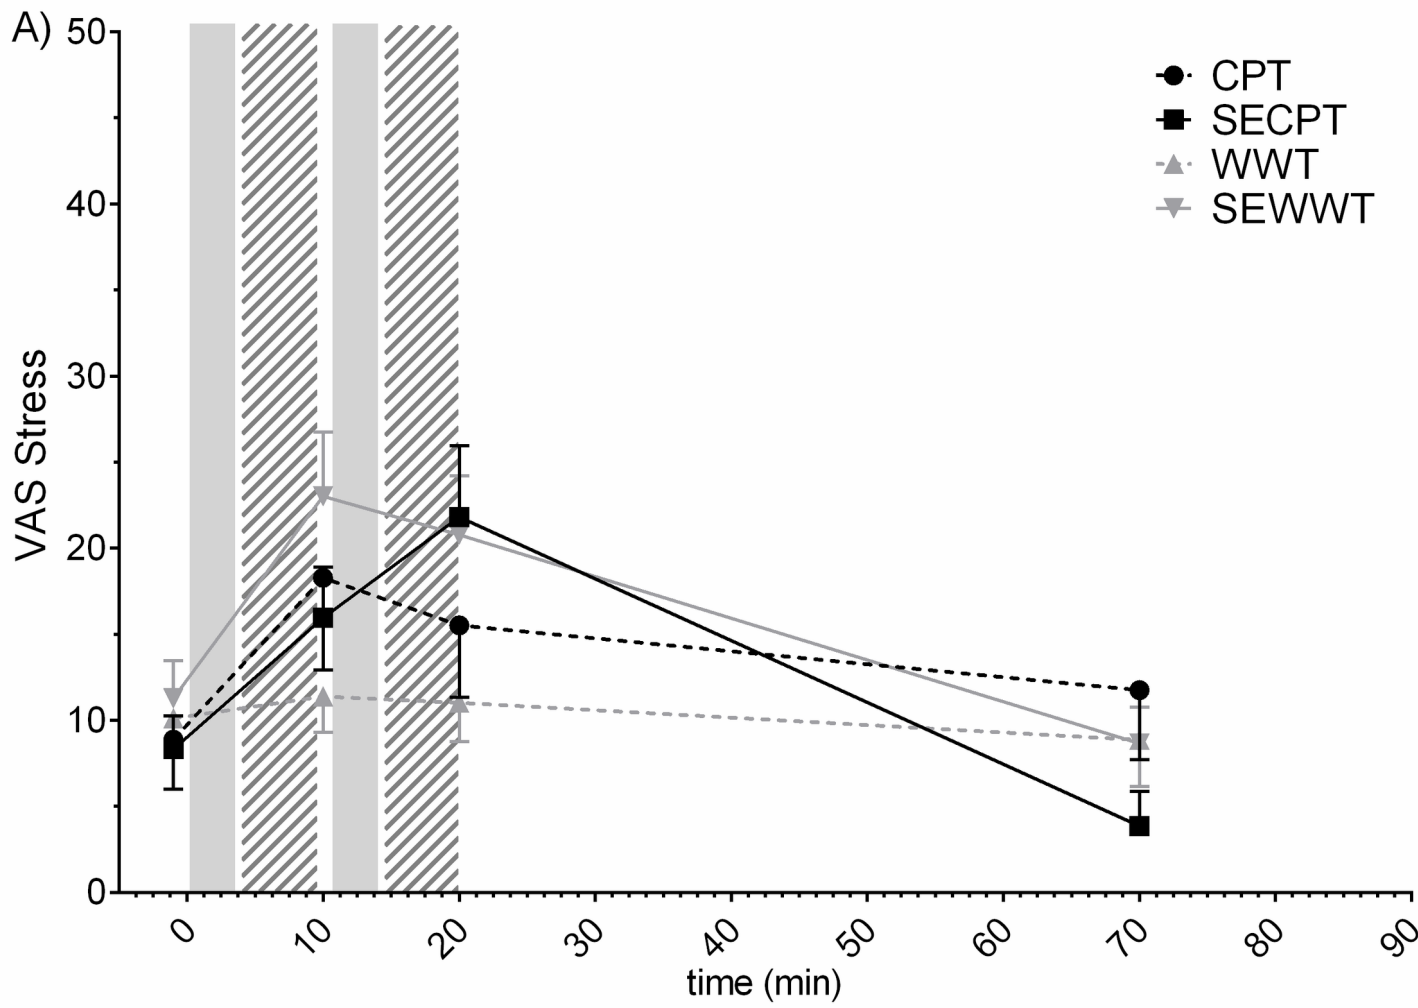

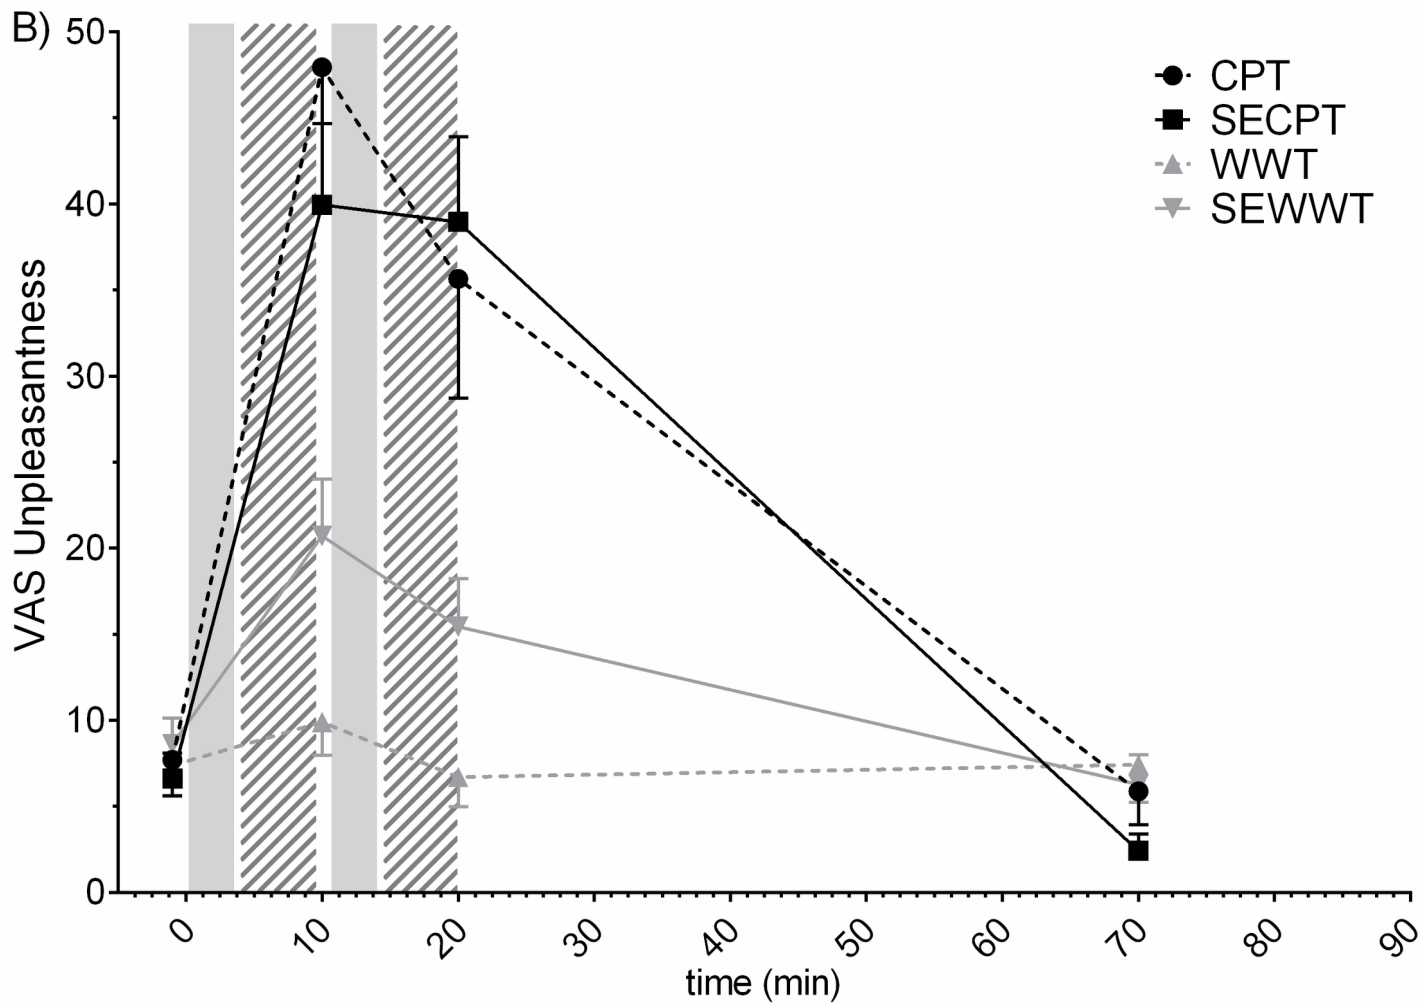

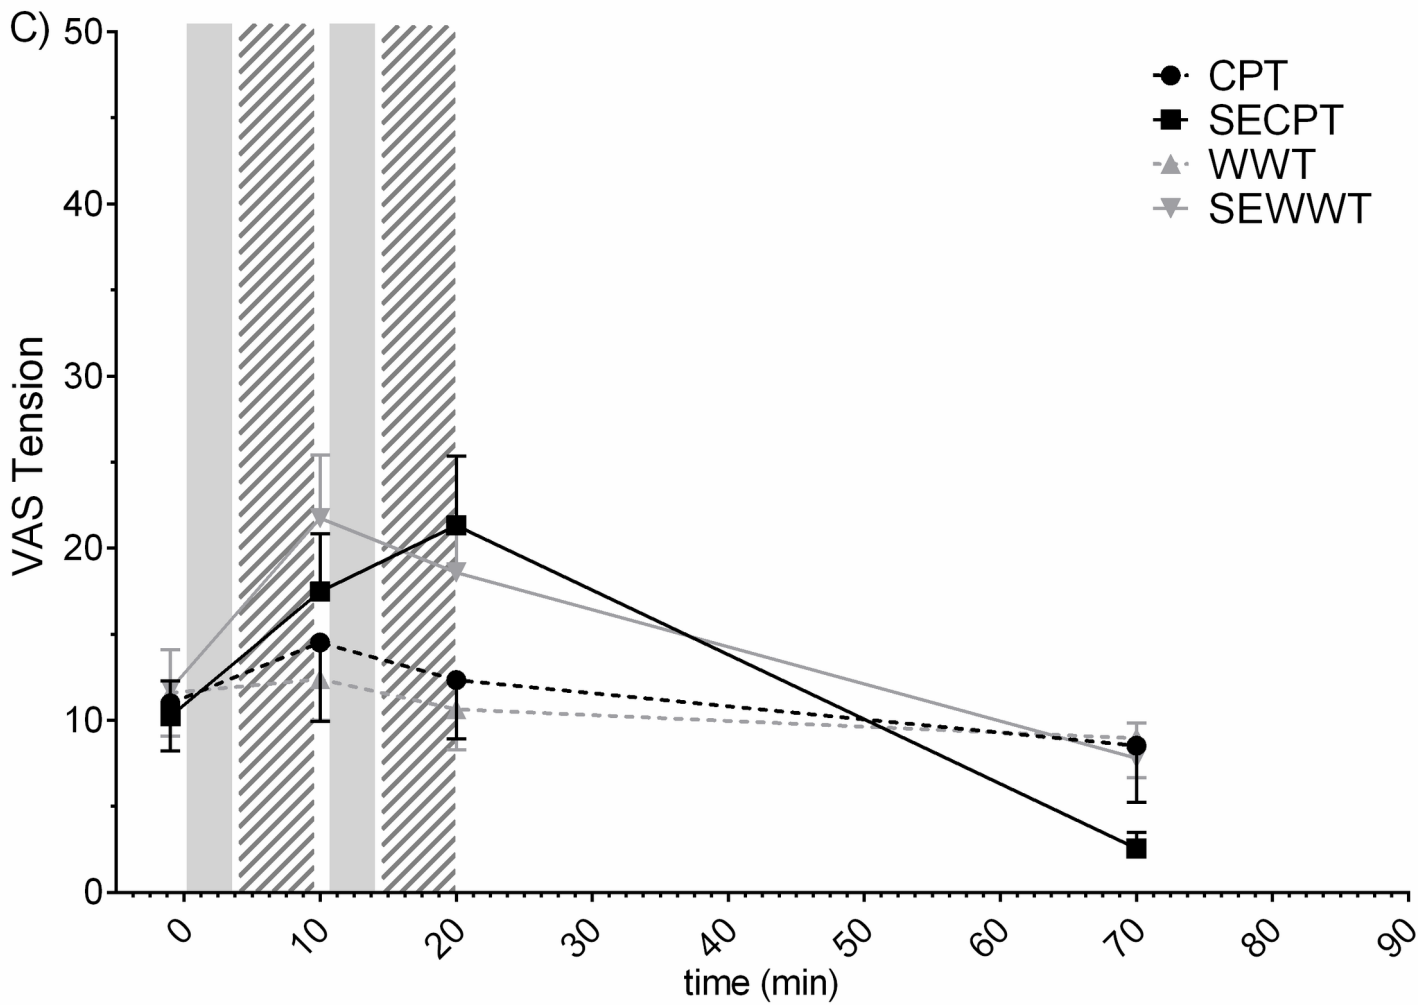

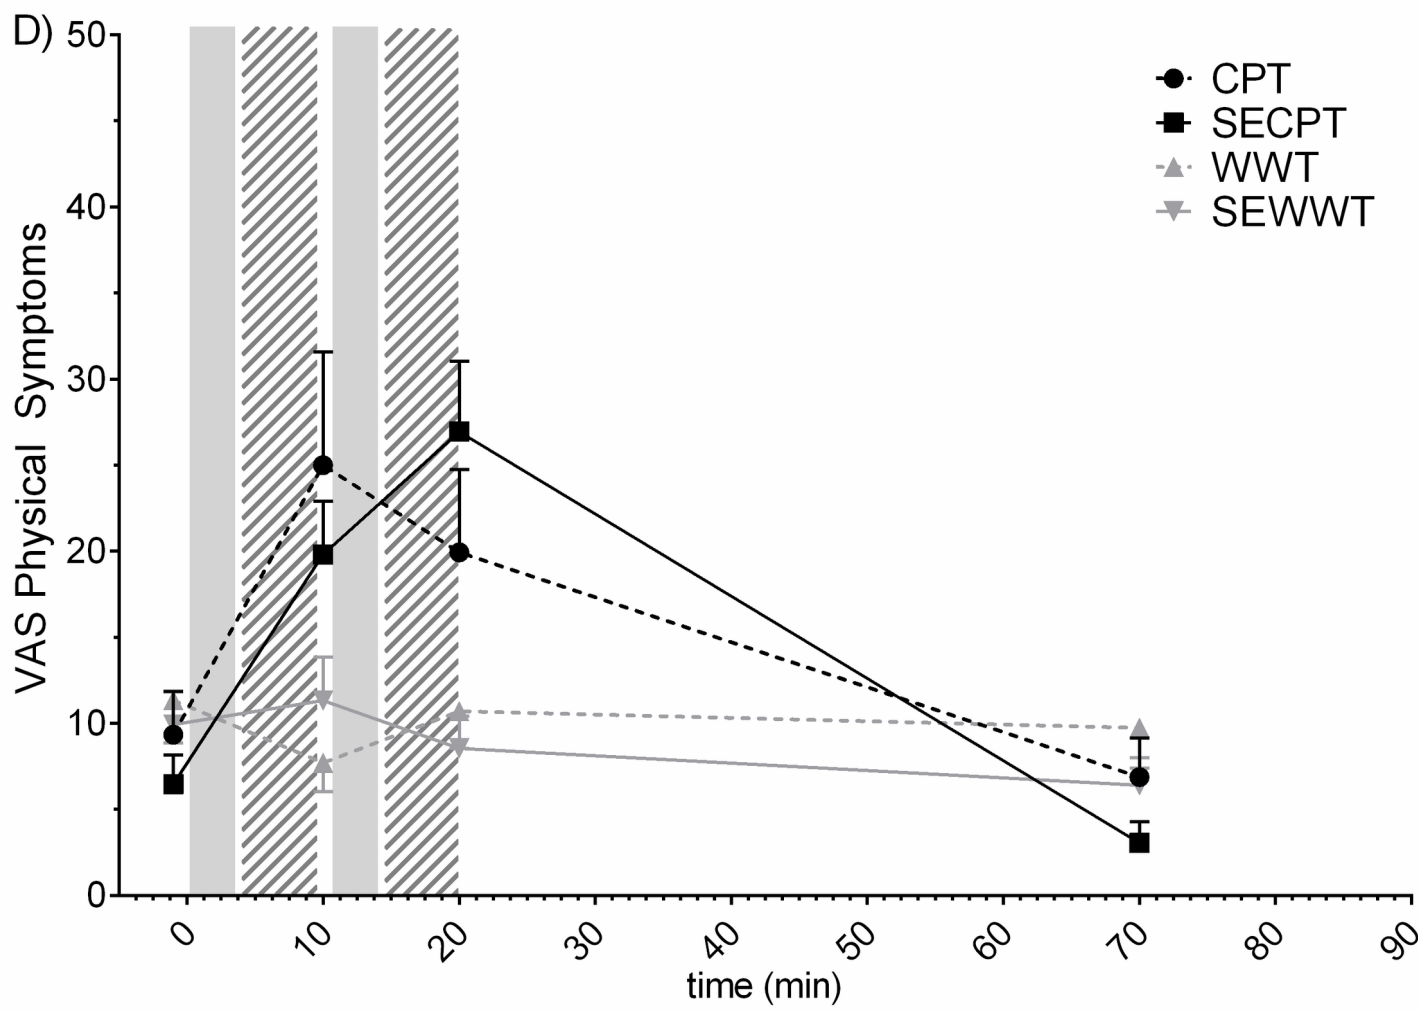

E)

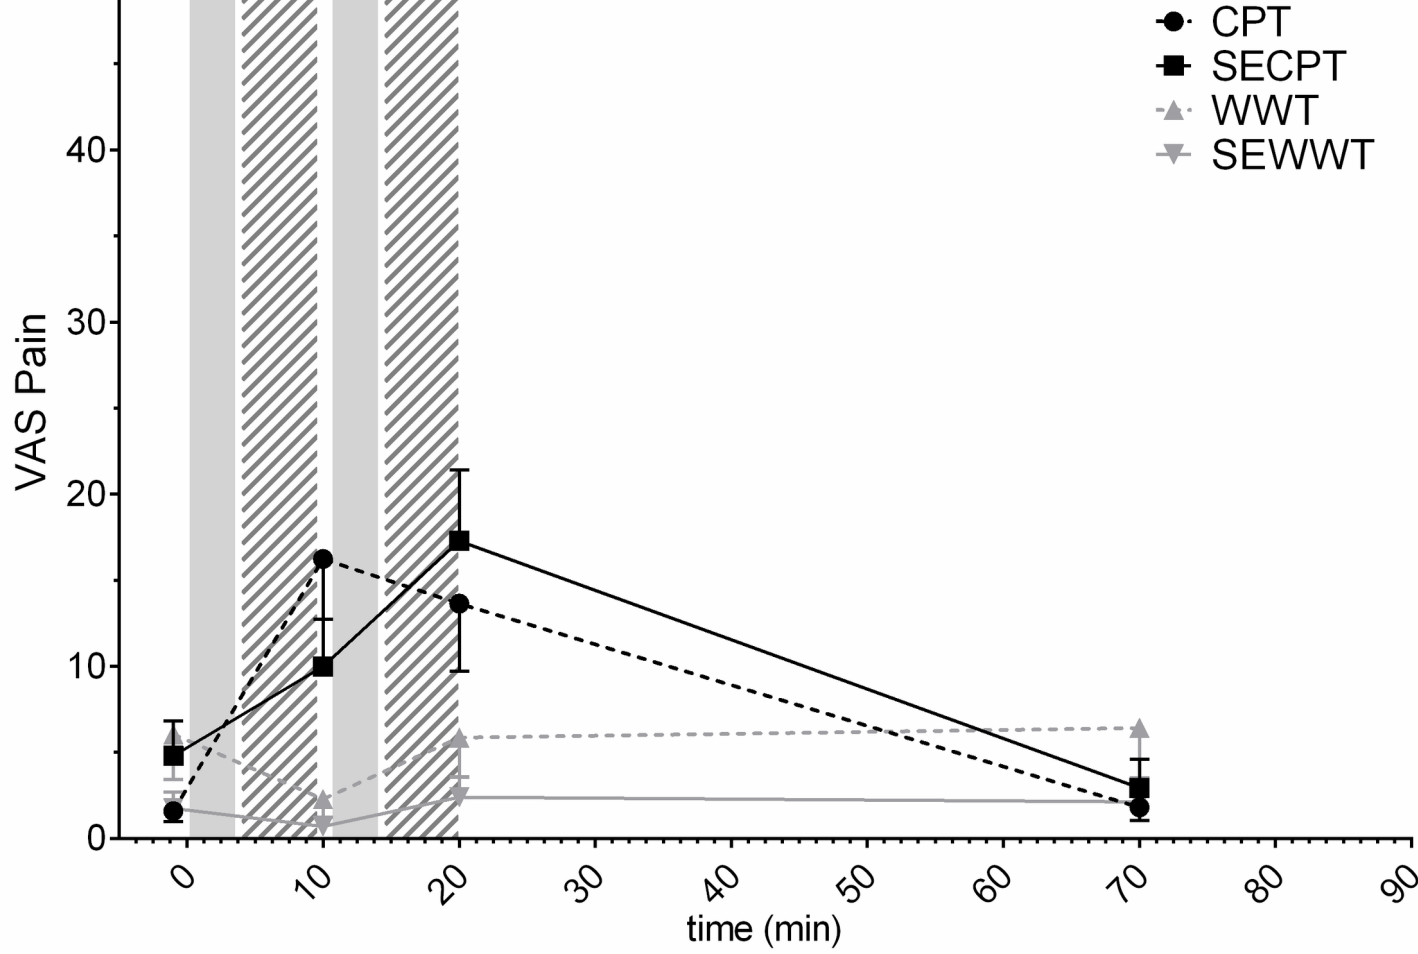

Supplement: pone.0204665.s002.pdf [file pone.0204665.s002.pdf]
