# Supplementary material for: Acute social and physical stress interact to influence social behavior: The role of social anxiety
Source: PubMed Central journal article supplement (PMC6201881; doi:10.1371/journal.pone.0204665), 2018-10-25
Supplement: pone.0204665.s003.pdf [file pone.0204665.s003.pdf]

**Table S1. Stastical values of baseline characteristics**

|                                | <i>F &amp; p physical stress</i> | <i>F &amp; p social stress</i> | <i>F &amp; p physical stress* social stress</i> | <i>F &amp; p social anxiety</i> | <i>F &amp; p depressive symptoms</i> |
|--------------------------------|----------------------------------|--------------------------------|-------------------------------------------------|---------------------------------|--------------------------------------|
| Cortisol                       | F(1,95)=0.746<br>p=0.390         | F(1,95)=0.724<br>p=0.397       | F(1,95)=0.153<br>p=0.696                        | F(1,95)=1.225<br>p=0.271        | F(1,95)=0.675<br>p=0.413             |
| Heart Rate during instructions | F(1,85)=0.004<br>p=0.950         | F(1,85)=0.285<br>p=0.595       | F(1,85)=0.330<br>p=0.567                        | F(1,85)=0.278<br>p=0.600        | F(1,85)=0.003<br>p=0.955             |
| Heart Rate baseline            | F(1,85)=0.002<br>p=0.963         | F(1,85)=3.168<br>p=0.079       | F(1,85)=0.105<br>p=0.747                        | F(1,85)=0.230<br>p=0.633        | F(1,85)=0.001<br>p=0.981             |
| VAS Stress                     | F(1,95)=0.567<br>p=0.453         | F(1,95)=0.111<br>p=0.740       | F(1,95)=0.183<br>p=0.669                        | F(1,95)=0.210<br>p=0.648        | F(1,95)=0.899<br>p=0.345             |
| VAS Unpleasantness             | F(1,95)=0.120<br>p=0.730         | F(1,95)=0.093<br>p=0.761       | F(1,95)=0.606<br>p=0.438                        | F(1,95)=0.667<br>p=0.416        | F(1,95)=1.294<br>p=0.258             |
| VAS Physical symptoms          | F(1,95)=0.937<br>p=0.335         | F(1,95)=0.336<br>p=0.564       | F(1,95)=0.075<br>p=0.785                        | F(1,95)=0.148<br>p=0.701        | F(1,95)=2.696<br>p=0.104             |
| VAS Tension                    | F(1,95)=0.107<br>p=0.744         | F(1,95)=0.002<br>p=0.964       | F(1,95)=0.030<br>p=0.864                        | F(1,95)=0.020<br>p=0.888        | F(1,95)=0.580<br>p=0.448             |
| VAS Pain                       | F(1,95)=0.095<br>p=0.758         | F(1,95)=0.005<br>p=0.942       | F(1,95)=2.574<br>p=0.112                        | F(1,95)=2.743<br>p=0.101        | F(1,95)=0.413<br>p=0.522             |
