# Supplementary material for: Acute social and physical stress interact to influence social behavior: The role of social anxiety
Source: PubMed Central journal article supplement (PMC6201881; doi:10.1371/journal.pone.0204665), 2018-10-25
Supplement: pone.0204665.s004.pdf [file pone.0204665.s004.pdf]

**Table S2. Stastical values of psychological stress response**

|                                | <i>F &amp; p<br/>physical<br/>stress</i> | <i>F &amp; p social stress</i> | <i>F &amp; p<br/>physical stress*<br/>social stress</i> | <i>F &amp; p social<br/>anxiety</i> | <i>F &amp; p depressive<br/>symptoms</i> |
|--------------------------------|------------------------------------------|--------------------------------|---------------------------------------------------------|-------------------------------------|------------------------------------------|
| VAS Stress Increase            | F(1,95)=1.187<br>p=0.279                 | F(1,95)=5.551<br>p=0.021       | F(1,95)=0.996<br>p=0.321                                | F(1,95)=3.397<br>p=0.068            | F(1,95)=0.363<br>p=0.548                 |
| VAS Unpleasantness Increase    | F(1,95)=58.414<br>p<0.001                | F(1,95)=0.642<br>p=0.425       | F(1,95)=1.998<br>p=0.161                                | F(1,95)=2.553<br>p=0.113            | F(1,95)=0.424<br>p=0.517                 |
| VAS Physical symptoms Increase | F(1,95)=28.051<br>p<0.001                | F(1,95)=0.289<br>p=0.592       | F(1,95)=0.124<br>p=0.725                                | F(1,95)=0.726<br>p=0.396            | F(1,95)=0.111<br>p=0.740                 |
| VAS Tension Increase           | F(1,95)=0.539<br>p=0.465                 | F(1,95)=7.901<br>p=0.006       | F(1,95)=0.001<br>p=0.975                                | F(1,95)=3.591<br>p=0.061            | F(1,95)=3.875<br>p=0.052                 |
| VAS Pain Increase              | F(1,95)=28.871<br>p<0.001                | F(1,95)=0.894<br>p=0.347       | F(1,95)=1.305<br>p=0.256                                | F(1,95)=0.372<br>p=0.543            | F(1,95)=0.057<br>p=0.812                 |
