# Supplementary material for: Acute social and physical stress interact to influence social behavior: The role of social anxiety
Source: PubMed Central journal article supplement (PMC6201881; doi:10.1371/journal.pone.0204665), 2018-10-25
Supplement: pone.0204665.s005.pdf [file pone.0204665.s005.pdf]

**Table S3. Stastical values of physiological stress response with repeated measures – Within subject results**

|            | <i>F &amp; p<br/>time</i>           | <i>F &amp; p<br/>time*physical<br/>stress</i> | <i>F &amp; p<br/>time*social<br/>stress</i> | <i>F &amp; p<br/>Time*physical<br/>stress*<br/>social stress</i> | <i>F &amp; p social<br/>anxiety</i> | <i>F &amp; p depressive<br/>symptoms</i> |
|------------|-------------------------------------|-----------------------------------------------|---------------------------------------------|------------------------------------------------------------------|-------------------------------------|------------------------------------------|
| Cortisol   | F(2.77,<br>262.95)=9.520<br>P<0.001 | F(2.77,<br>262.95)=36.912<br>p<0.001          | F(2.77,<br>262.95)=0.718<br>p=0.532         | F(2.77,<br>262.95)=0.545<br>p=0.638                              | F(2.77,<br>262.95)=0.433<br>p=0.714 | F(2.77,<br>262.95)=0.641<br>p=0.577      |
| Heart Rate | F(4.96,<br>421.50)=3.484<br>P=0.004 | F(4.96,<br>421.50)=8.945<br>p<0.001           | F(4.96,<br>421.50)=2.852<br>p=0.015         | F(4.96,<br>421.50)=2.717<br>p=0.020                              | F(4.96,<br>421.50)=0.473<br>p=0.795 | F(4.96,<br>421.50)=1.176<br>p=0.320      |
