# Supplementary material for: Acute social and physical stress interact to influence social behavior: The role of social anxiety
Source: PubMed Central journal article supplement (PMC6201881; doi:10.1371/journal.pone.0204665), 2018-10-25
Supplement: pone.0204665.s006.pdf [file pone.0204665.s006.pdf]

**Table S4. Stastical values of physiological stress response with repeated measures – Between subjects main effects**

|            | <i>F &amp; p<br/>physical<br/>stress</i> | <i>F &amp; p<br/>social stress</i> | <i>F &amp; p<br/>physical stress*<br/>social stress</i> | <i>F &amp; p social<br/>anxiety</i> | <i>F &amp; p depressive<br/>symptoms</i> |
|------------|------------------------------------------|------------------------------------|---------------------------------------------------------|-------------------------------------|------------------------------------------|
| Cortisol   | F(1,95)=17.193<br>p<0.001                | F(1,95)=0.507<br>p=0.478           | F(1,95)=0.128<br>p=0.721                                | F(1,95)=0.903<br>p=0.344            | F(1,95)=0.491<br>p=0.485                 |
| Heart Rate | F(1,85)=0.690<br>p=0.408                 | F(1,85)=3.893<br>p=0.052           | F(1,85)=0.500<br>p=0.481                                | F(1,85)=0.083<br>p=0.774            | F(1,85)=0.183<br>p=0.711                 |
