# Supplementary material for: Acute social and physical stress interact to influence social behavior: The role of social anxiety
Source: PubMed Central journal article supplement (PMC6201881; doi:10.1371/journal.pone.0204665), 2018-10-25
Supplement: pone.0204665.s007.pdf [file pone.0204665.s007.pdf]

**Table S5. Stastical values of physiological stress response – maximum increases of cortisol and heart rate**

|                                             | <i>F &amp; p<br/>physical<br/>stress</i>            | <i>F &amp; p<br/>social stress</i>                  | <i>F &amp; p<br/>physical stress*<br/>social stress</i> | <i>F &amp; p social<br/>anxiety</i>                 | <i>F &amp; p depressive<br/>symptoms</i>            |
|---------------------------------------------|-----------------------------------------------------|-----------------------------------------------------|---------------------------------------------------------|-----------------------------------------------------|-----------------------------------------------------|
| Cortisol Increase                           | F(1,95)=83.190<br>p<0.001                           | F(1,95)=0.470<br>p=0.494                            | F(1,95)=1.169<br>p=0.282                                | F(1,95)=0.018<br>p=0.894                            | F(1,95)=0.165<br>p=0.685                            |
| MANCOVA HR<br>Increase<br>(multivariate)    | F(2,84)=5.997<br>Wilk's $\Lambda$ =0.875<br>p=0.004 | F(2,84)=1.563<br>Wilk's $\Lambda$ =0.964<br>p=0.216 | F(2,84)=0.445<br>Wilk's $\Lambda$ =0.990<br>p=0.642     | F(2,84)=0.202<br>Wilk's $\Lambda$ =0.995<br>P=0.818 | F(2,84)=0.978<br>Wilk's $\Lambda$ =0.977<br>p=0.380 |
| Heart Rate Increase I<br>(between subject)  | F(1,85)=11.602<br>p=0.001                           | F(1,85)=2.540<br>p=0.115                            | F(1,85)=0.874<br>p=0.353                                | F(1,85)=0.129<br>p=0.720                            | F(1,85)=0.516<br>p=0.475                            |
| Heart Rate Increase II<br>(between subject) | F(1,85)=2.284<br>p=0.134                            | F(1,85)=0.125<br>p=0.724                            | F(1,85)=0.198<br>p=0.658                                | F(1,85)=0.039<br>p=0.845                            | F(1,85)=11.602<br>p=0.001                           |
