# Supplementary material for: Acute social and physical stress interact to influence social behavior: The role of social anxiety
Source: PubMed Central journal article supplement (PMC6201881; doi:10.1371/journal.pone.0204665), 2018-10-25
Supplement: pone.0204665.s008.pdf [file pone.0204665.s008.pdf]

**Table S6. Stastical values of ANCOVA models for behavioral paradigms**

|                 | <i>F &amp; p<br/>physical<br/>stress</i> | <i>F &amp; p<br/>social stress</i> | <i>F &amp; p<br/>physical stress*<br/>social stress</i> | <i>F &amp; p social<br/>anxiety</i> | <i>F &amp; p depressive<br/>symptoms</i> |
|-----------------|------------------------------------------|------------------------------------|---------------------------------------------------------|-------------------------------------|------------------------------------------|
| Trust           | F(1,95)=0.631<br>p=0.429                 | F(1,95)=0.126<br>p=0.723           | F(1,95)=4.489<br>p=0.037                                | F(1,95)=12.522<br>p=0.001           | F(1,95)=0.031<br>p=0.861                 |
| Trustworthiness | F(1,95)=0.205<br>p=0.652                 | F(1,95)=1.050<br>p=0.308           | F(1,95)=10.394<br>p=0.027                               | F(1,95)=2.269<br>p=0.135            | F(1,95)=0.145<br>p=0.705                 |
| Sharing         | F(1,95)=0.390<br>p=0.534                 | F(1,95)=3.790<br>p=0.055           | F(1,95)=5.937<br>p=0.017                                | F(1,95)=0.112<br>p=0.738            | F(1,95)=0.116<br>p=0.735                 |
| Punishment      | F(1,95)=0.505<br>p=0.479                 | F(1,95)=0.703<br>p=0.404           | F(1,95)=3.555<br>p=0.062                                | F(1,95)=0.267<br>p=0.607            | F(1,95)=0.056<br>p=0.813                 |
| Risk            | F(1,95)=0.170<br>p=0.681                 | F(1,95)=4.974<br>p=0.028           | F(1,95)=0.200<br>p=0.656                                | F(1,95)=0.413<br>p=0.522            | F(1,95)=0.863<br>p=0.355                 |
