# Supplementary material for: Acute social and physical stress interact to influence social behavior: The role of social anxiety
Source: PubMed Central journal article supplement (PMC6201881; doi:10.1371/journal.pone.0204665), 2018-10-25
Supplement: pone.0204665.s009.pdf [file pone.0204665.s009.pdf]

**Table S7. Stepwise regression to explore relationships between of stress systems and trust**

| Trust     |       |                |                               |       |                                      |                  |
|-----------|-------|----------------|-------------------------------|-------|--------------------------------------|------------------|
| condition | model | R <sup>2</sup> | R <sup>2</sup> <sub>adj</sub> | p     | predictor                            | β                |
| WWT       | n.s.  |                |                               |       |                                      |                  |
| SEWWT     | 1     | 0.223          | 0.194                         | 0.010 | VAS Unpleasantness Increase          | 0.033            |
| CPT       | 1     | 0.505          | 0.470                         | 0.002 | VAS Unpleasantness Increase          | 0.037            |
| SECPT     | 1     | 0.364          | 0.324                         | 0.008 | Cort Increase                        | -0.116           |
|           | 2     | 0.598          | 0.545                         | 0.001 | Cort Increase<br>VAS Stress Increase | -0.153<br>-0.048 |
