# Supplementary material for: Acute social and physical stress interact to influence social behavior: The role of social anxiety
Source: PubMed Central journal article supplement (PMC6201881; doi:10.1371/journal.pone.0204665), 2018-10-25
Supplement: pone.0204665.s010.pdf [file pone.0204665.s010.pdf]

**Table S8. Stepwise regression to explore relationships between of stress systems and trustworthiness**

### Trustworthiness

| condition | model | R <sup>2</sup> | R <sup>2</sup> <sub>adj</sub> | p     | predictor     | β      |
|-----------|-------|----------------|-------------------------------|-------|---------------|--------|
| WWT       | n.s.  |                |                               |       |               |        |
| SEWWT     | n.s.  |                |                               |       |               |        |
| CPT       | n.s.  |                |                               |       |               |        |
| SECPT     | 1     | 0.375          | 0.336                         | 0.007 | Cort Increase | -0.122 |
