# Supplementary material for: Acute social and physical stress interact to influence social behavior: The role of social anxiety
Source: PubMed Central journal article supplement (PMC6201881; doi:10.1371/journal.pone.0204665), 2018-10-25
Supplement: pone.0204665.s011.pdf [file pone.0204665.s011.pdf]

**Table S9. Stepwise regression to explore relationships between of stress systems and sharing**

### Sharing

| condition | model | R <sup>2</sup> | R <sup>2</sup> <sub>adj</sub> | p     | predictor           | β      |
|-----------|-------|----------------|-------------------------------|-------|---------------------|--------|
| WWT       | n.s.  |                |                               |       |                     |        |
| SEWWT     | n.s.  |                |                               |       |                     |        |
| CPT       | 1     | 0.253          | 0.199                         | 0.047 | Heart Rate Increase | -0.221 |
| SECPT     | 1     | 0.245          | 0.198                         | 0.037 | Cort Increase       | -0.112 |
