# Supplementary material for: Acute social and physical stress interact to influence social behavior: The role of social anxiety
Source: PubMed Central journal article supplement (PMC6201881; doi:10.1371/journal.pone.0204665), 2018-10-25
Supplement: pone.0204665.s012.pdf [file pone.0204665.s012.pdf]

**Table S10. Stepwise regression to explore relationships between of stress systems and punishment**

**Punishment**

| condition | model | $R^2$ | $R^2_{adj}$ | p     | predictor           | $\beta$ |
|-----------|-------|-------|-------------|-------|---------------------|---------|
| WWT       | 1     | 0.150 | 0.117       | 0.042 | Heart Rate Increase | -0.136  |
| SEWWT     | n.s.  |       |             |       |                     |         |
| CPT       | n.s.  |       |             |       |                     |         |
| SECPT     | n.s.  |       |             |       |                     |         |
