# Supplementary material for: Acute social and physical stress interact to influence social behavior: The role of social anxiety
Source: PubMed Central journal article supplement (PMC6201881; doi:10.1371/journal.pone.0204665), 2018-10-25
Supplement: pone.0204665.s013.pdf [file pone.0204665.s013.pdf]

**Table S11. Stepwise regression to explore relationships between of stress systems and risk**

## Risk

|           |       | $R^2$ | $R^2_{adj}$ | p | predictor | $\beta$ |
|-----------|-------|-------|-------------|---|-----------|---------|
| condition | model |       |             |   |           |         |
| WWT       | n.s.  |       |             |   |           |         |
| SEWWT     | n.s.  |       |             |   |           |         |
| CPT       | n.s.  |       |             |   |           |         |
| SECPT     | n.s.  |       |             |   |           |         |
